# Supplementary material for: Inhalable nanovesicles loaded with a STING agonist enhance CAR-T cell activity against solid tumors in the lung
Source: PubMed Central journal article supplement — Nat Commun. 2025 Jan 2;16:262. doi: 10.1038/s41467-024-55751-4 (PMC11695690; doi:10.1038/s41467-024-55751-4), 2025-01-02
Supplement: 41467_2024_55751_MOESM1_ESM.pdf [file 41467_2024_55751_MOESM1_ESM.pdf]

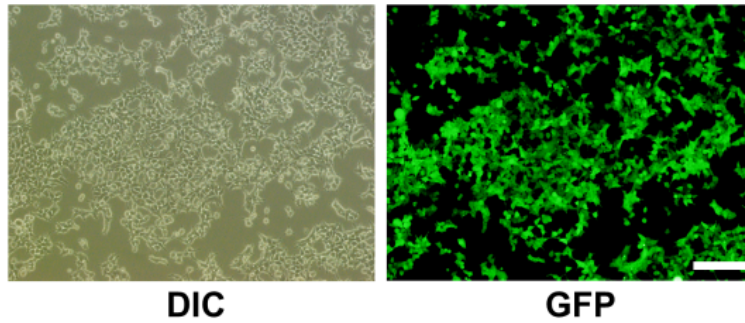

17

18 **Supplementary Figure 1. Packaging of lentivirus encoding CAR protein.** After the plasmid  
 19 encoding CAR protein was co-transfected with the helper plasmid into 293T cells for 24 hours, the  
 20 lentiviral packaging efficiency was reflected by fluorescence expression in 293T cells observed by  
 21 inverted fluorescence microscopy. Experiment was repeated three times independently with similar  
 22 results. Scale bar: 200  $\mu\text{m}$ .

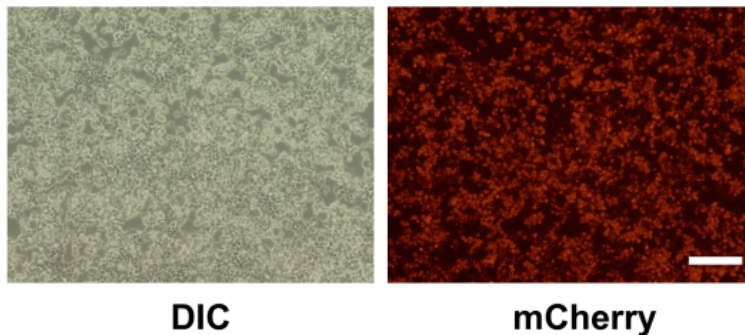

23

24 **Supplementary Figure 2. Packaging of lentivirus encoding MSLN protein.** After co-transfection  
 25 of MSLN protein-encoding plasmid and helper plasmid into 293T cells for 24 hours, lentiviral  
 26 packaging efficiency was reflected by fluorescence expression in 293T cells observed by inverted  
 27 fluorescence microscopy. Experiment was repeated three times independently with similar results.  
 28 Scale bar: 200  $\mu\text{m}$ .

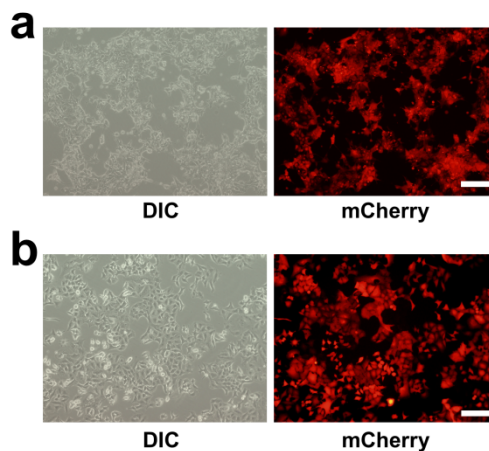

29

30 **Supplementary Figure 3. Construction of LLC and B16 cells expressing MSLN.** (a-b) The  
 31 purity of (a) LLC-MSLN and (b) B16-MSLN cells was assessed by inverted fluorescence

32 microscopy after 2 weeks of screening of lentivirus-infected LLC and B16 cells with puromycin.  
 33 Experiment was repeated three times independently with similar results. Scale bar: 200  $\mu\text{m}$ .

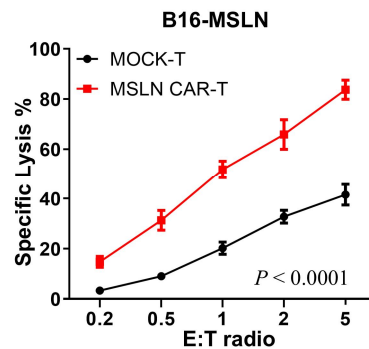

34  
 35 **Supplementary Figure 4. Lysis rate of B16-MSLN cells by CAR-T cells.** The lysis rate of CAR-  
 36 T cells against B16-MSLN cells after co-incubation of CAR-T cells with B16-MSLN cells at  
 37 effector-target ratios of 0.2, 0.5, 1, 2, and 5 for 24 hours was determined by LDH assay ( $n = 3$   
 38 independent experiments). The  $p$  values were determined by two-way ANOVA with Tukey's post-  
 39 test. Source data are provided as a Source Data file.

40

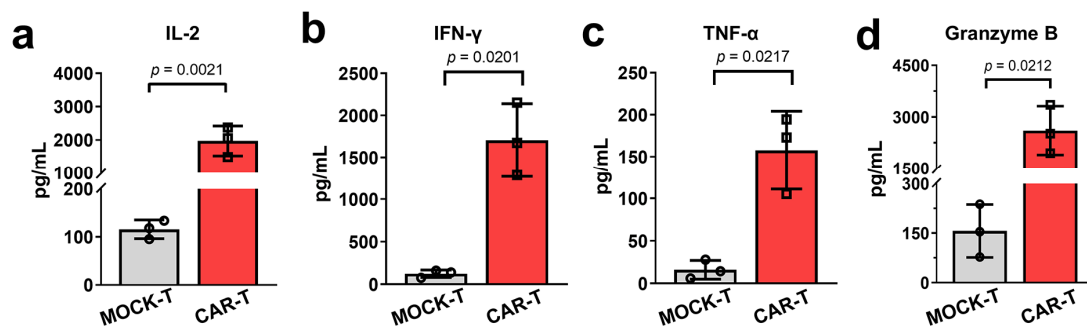

41  
 42 **Supplementary Figure 5. Cytokine release upon lysis of B16-MSLN cells by CAR-T cells.** The  
 43 levels of cytokines IL-2, IFN- $\gamma$ , TNF- $\alpha$  and granzyme B in the supernatants were determined by  
 44 ELISA after co-incubation of CAR-T cells with B16-MSLN cells ( $n = 3$  independent experiments).  
 45 The  $p$  values were determined by Student's  $t$  test. Source data underlying a-d are provided as a  
 46 Source Data file.

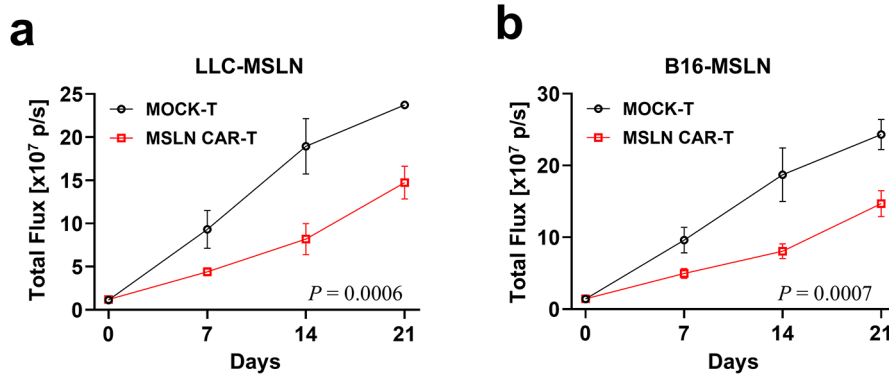

47

48 **Supplementary Figure 6. Statistical analysis of bioluminescence intensity.** Bioluminescence was  
49 measured by the IVIS system to evaluate tumor growth across different treatment groups, with  
50 statistical analysis of bioluminescence intensity ( $n = 4$  mice). The  $p$  values were determined by two-  
51 way ANOVA with Tukey's post-test. Source data underlying a–b are provided as a Source Data file.

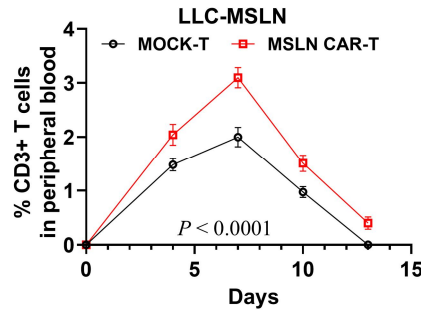

52  
53 **Supplementary Figure 7. Percentage of CAR-T cells in the peripheral blood of tumor-bearing**  
54 **mice.** The percentage of CAR-T cells in peripheral blood at various time points after injection of  
55 GFP-expressing MOCK-T or MSLN CAR-T cells into LLC-MSLN tumor-bearing mice ( $n = 4$   
56 mice). The  $p$  values were determined by two-way ANOVA with Tukey's post-test. Source data are  
57 provided as a Source Data file.

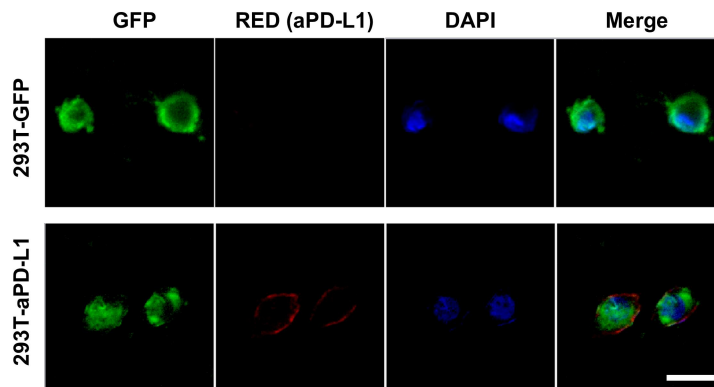

58  
59 **Supplementary Figure 8. Binding of 293-aPD-L1 cells to recombinant PD-L1 protein.** After  
60 co-incubation of 293-aPD-L1 cells with recombinant PD-L1 protein, the cells were stained using an  
61 anti-PD-L1 antibody, and binding interactions were assessed *via* confocal microscopy. Experiment  
62 was repeated three times independently with similar results. Scale bar: 20  $\mu\text{m}$ .

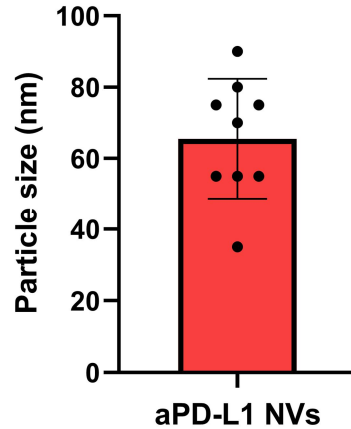

63

64 **Supplementary Figure 9. Size distribution of aPD-L1 NVs.** Statistical analysis of the size  
 65 distribution of aPD-L1 NVs obtained through transmission electron microscopy ( $n = 9$  nanovesicles).  
 66 Source data are provided as a Source Data file.

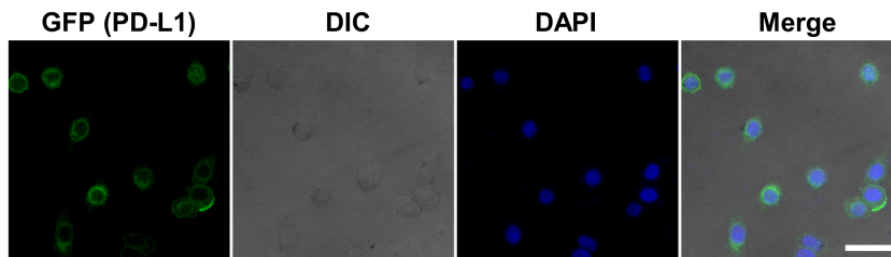

67

68 **Supplementary Figure 10. Construction of PC-9 cells expressing GFP-PD-L1 in the membrane.**  
 69 After 2 weeks of screening lentivirus-infected PC-9 cells with puromycin, GFP expression on cell  
 70 membranes was observed by confocal microscopy. Experiment was repeated three times  
 71 independently with similar results. Scale bar: 50  $\mu$ m.

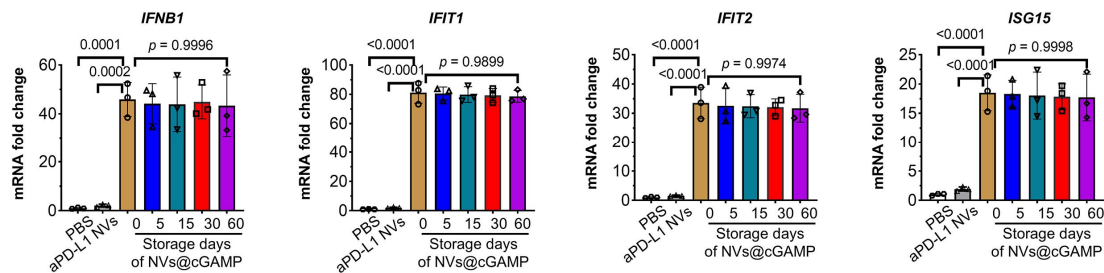

72

73 **Supplementary Figure 11. Functional analysis of aPD-L1 NVs@cGAMP after storage.** After  
 74 storage of aPD-L1 NVs@cGAMP at  $-80^{\circ}\text{C}$  for varying durations, co-culture with dendritic cells  
 75 (DCs) resulted in altered mRNA expression levels of *IFNB1*, *IFIT1*, *IFIT2*, and *ISG15* in DCs. DCs  
 76 treated with PBS and aPD-L1 NVs served as negative controls ( $n = 3$  independent experiments). All  
 77 data are expressed as mean  $\pm$  S.D. The  $p$  values were determined by one-way ANOVA with Tukey's  
 78 post-test. Source data are provided as a Source Data file.

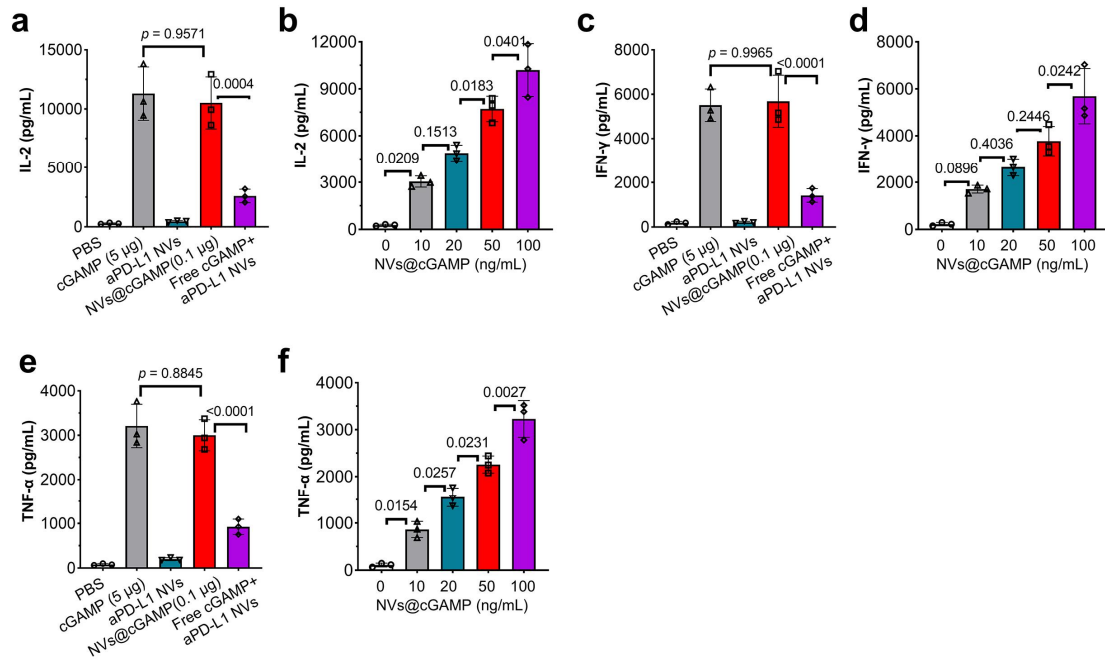

79

80 **Supplementary Figure 12. Effect of agents on cytokine secretion during CAR-T killing of**  
 81 **tumor cells.** (a, c and e) IL-2, IFN- $\gamma$  and TNF- $\alpha$  levels in the supernatants after 12 h of addition of  
 82 different agents to the co-incubation system of CAR-T cells, DCs and LLC-MSLN cells were  
 83 assessed by ELISA ( $n = 3$  independent experiments). (b, d and f) After adding different doses of  
 84 aPD-L1 NVs@cGAMP to the co-incubation system of CAR-T cells, DCs and LLC-MSLN cells for  
 85 12 h, the dose-dependent release of IL-2, IFN- $\gamma$  and TNF- $\alpha$  was detected by ELISA ( $n = 3$   
 86 independent experiments). The  $p$  values were determined by one-way ANOVA with Tukey's post-  
 87 test for (a), (c) and (e). Source data underlying a–f are provided as a Source Data file.

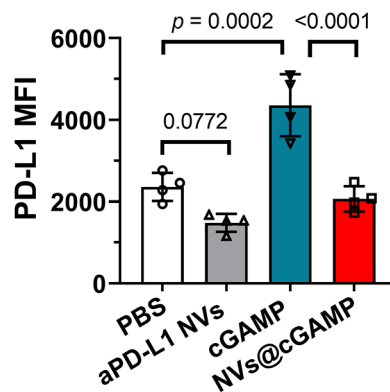

88

89 **Supplementary Figure 13. Blockade of PD-L1 by NVs@cGAMP.** After treatment of LLC-MSLN  
 90 tumor-bearing mice with PBS, cGAMP, aPD-L1 NVs and NVs@cGAMP, tumor tissues were  
 91 isolated and PD-L1 expression on the surface of tumor cells was detected by flow cytometry ( $n = 4$   
 92 mice). Data are expressed as mean  $\pm$  S.D. The  $p$  values were determined by one-way ANOVA with  
 93 Tukey's post-test. Source data are provided as a Source Data file.

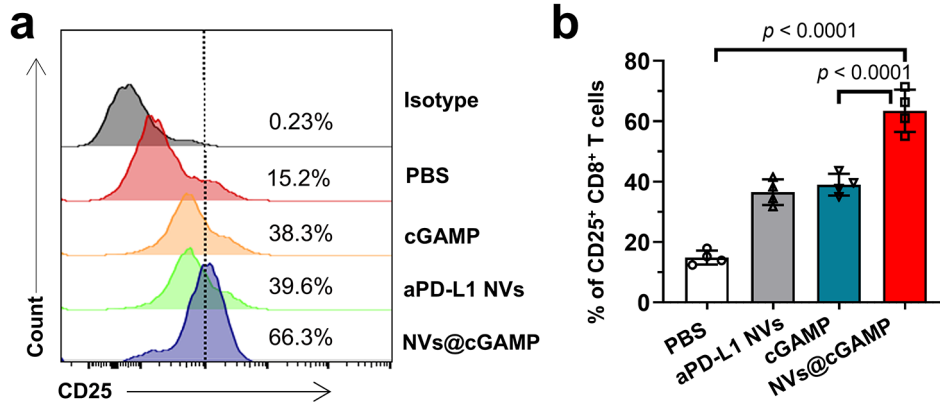

94  
 95 **Supplementary Figure 14. CD25 expression levels on T cells.** Representative flow cytometry  
 96 plots and statistical analysis of CD25 expression levels on T cells across different treatment groups  
 97 by flow cytometry ( $n = 4$  mice). The  $p$  values were determined by one-way ANOVA with Tukey's  
 98 post-test. Source data underlying b are provided as a Source Data file.

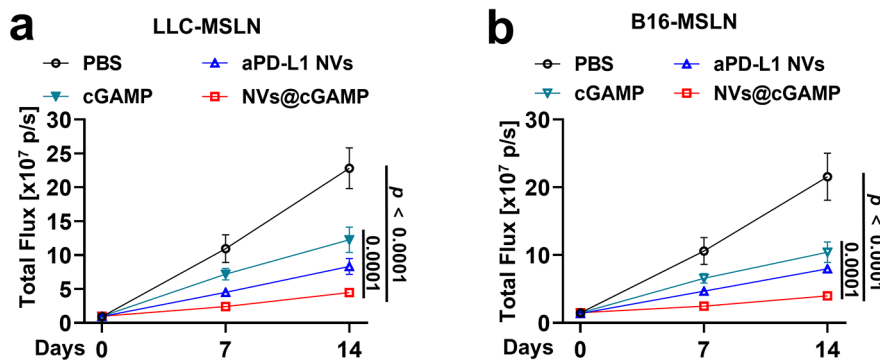

99  
 100 **Supplementary Figure 15. Statistical analysis of bioluminescence intensity.** (a-b)  
 101 Bioluminescence intensity was measured in (a) LLC-MSLN tumor-bearing mice and (b) B16-  
 102 MSLN tumor-bearing mice after receiving various treatments, followed by statistical analysis ( $n =$   
 103 4 mice). Data are expressed as mean  $\pm$  S.D. The  $p$  values were determined by two-way ANOVA  
 104 with Tukey's post-test. Source data underlying a-b are provided as a Source Data file.

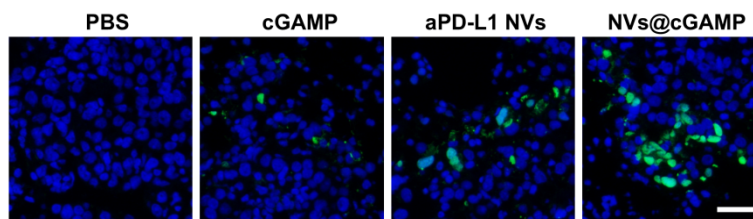

105  
 106 **Supplementary Figure 16. TUNEL staining of lung tumor tissue sections.** Lung tumor tissue  
 107 damage was assessed by TUNEL staining after various treatments in tumor-bearing mice.  
 108 Experiment was repeated three times independently with similar results. Scale bar: 100  $\mu$ m.

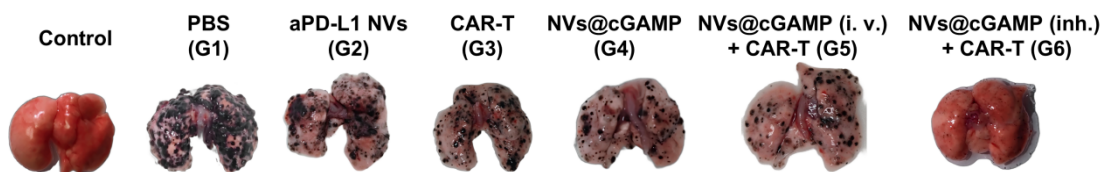

109



110 **Supplementary Figure 17. Lung metastases in tumor-bearing mice.** Representative images of  
111 the lungs of B16-MSLN tumor-bearing mice from the different treatment groups ( $n = 4$  mice).

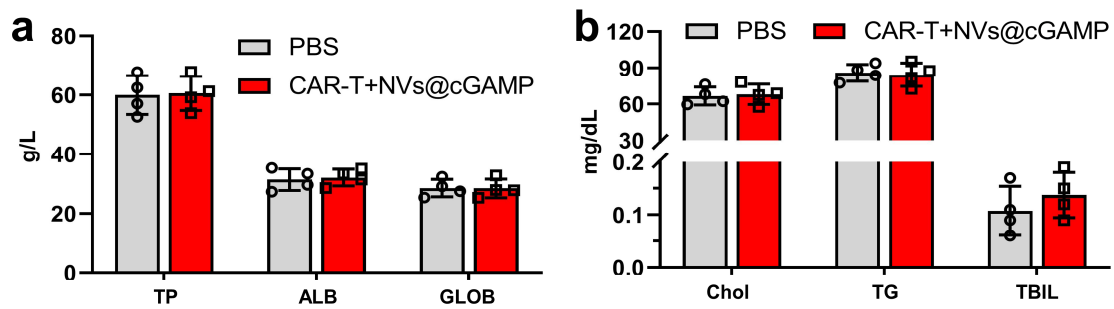

112

113 **Supplementary Figure 18. Safety assessment of combination therapy.** After mice received PBS  
114 or combination therapy, mouse serum was collected for biochemical analysis to assess the safety of  
115 combination therapy ( $n = 4$  mice). Total Protein (TP), Albumin (ALB), Globulin (GLOB),  
116 Cholesterol (CHOL), Triglycerides (TG), Total Bilirubin (TBIL). All data are presented as the mean  
117  $\pm$  S.D. Source data underlying a–b are provided as a Source Data file.

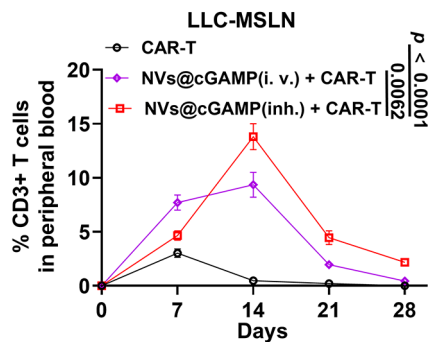

118

119 **Supplementary Figure 19. Percentage of CAR-T cells in the peripheral blood of tumor-bearing**  
120 **mice.** The percentage of CAR-T cells in peripheral blood at various time points after injection of  
121 GFP-expressing MOCK-T or MSLN CAR-T cells into LLC-MSLN tumor-bearing mice ( $n = 4$   
122 mice). Data are expressed as mean  $\pm$  S.D. The  $p$  values were determined by two-way ANOVA with  
123 Tukey's post-test. Source data are provided as a Source Data file.



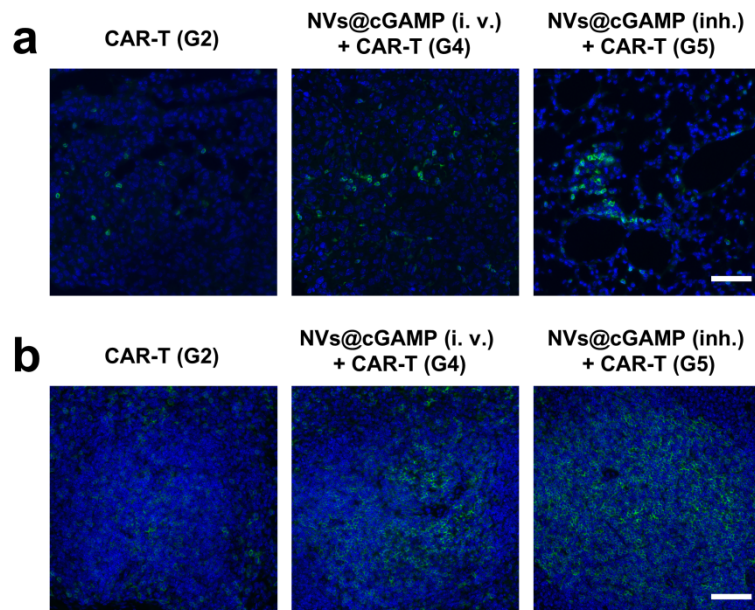

124  
125  
126  
127  
128  
129  
130

**Supplementary Figure 20. Infiltration of CAR-T cells in tissues.** (a) After different treatments were administered to LLC-MSLN tumor-bearing mice, CAR-T cell infiltration in tumor tissues was observed using confocal microscopy. Scale bar: 50  $\mu\text{m}$ . (b) After different treatments were administered to LLC-MSLN tumor-bearing mice, CAR-T cell infiltration in spleens was observed using confocal microscopy. Experiment was repeated three times independently with similar results. Scale bar: 100  $\mu\text{m}$ .

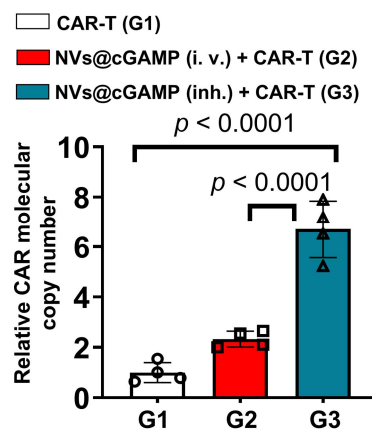

131  
132  
133  
134  
135

**Supplementary Figure 21. Proliferation of CAR-T cells in tumor tissue.** The copy number of CAR per microgram of genomic DNA was assessed by qPCR to evaluate intratumoral CAR-T cell proliferation ( $n = 4$  mice). All data are presented as the mean  $\pm$  S.D. The  $p$  values were determined by one-way ANOVA with Tukey's post-test. Source data are provided as a Source Data file.

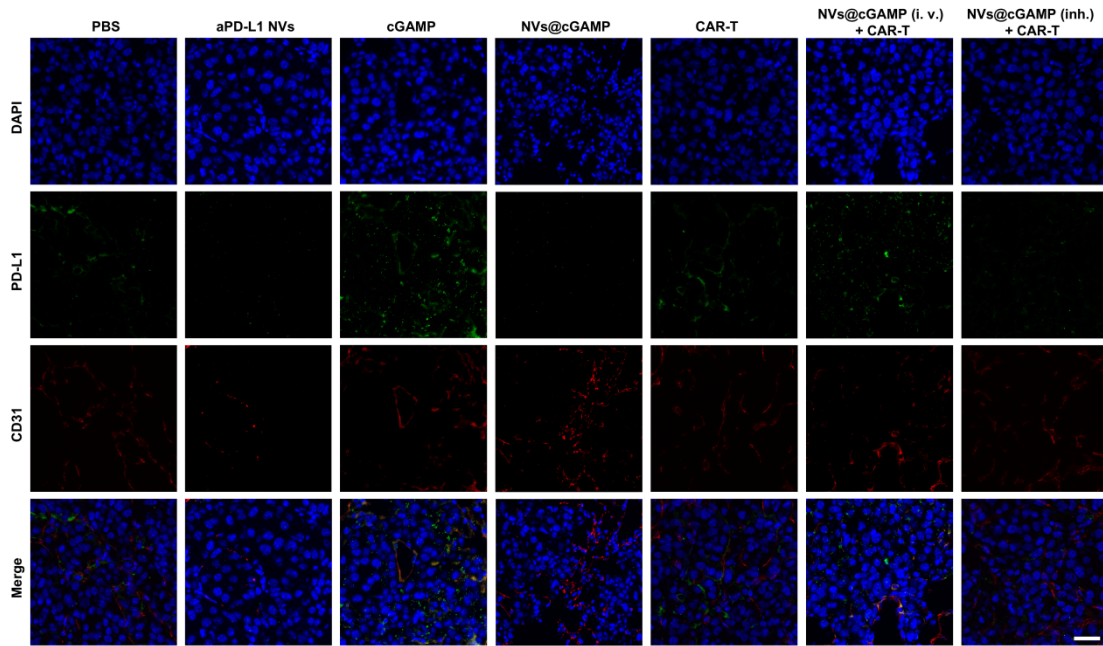

136  
137  
138  
139  
140

**Supplementary Figure 22. Co-expression of CD31 and PD-L1 in tumor tissues.** Following different treatments of LLC-MSLN tumor-bearing mice, co-expression of CD31 (red) and PD-L1 (green) in tumor tissues was analyzed by confocal microscopy, with CD31 serving as a vascular marker. Experiment was repeated three times independently with similar results. Scale bar: 50  $\mu\text{m}$ .

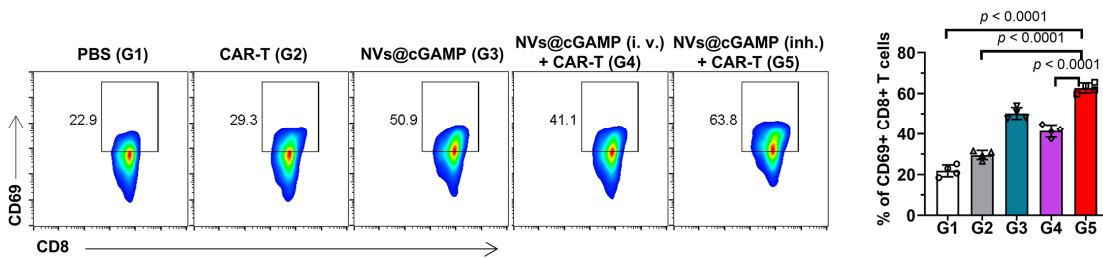

141  
142  
143  
144  
145  
146

**Supplementary Figure 23. CD69 expression levels on CD8<sup>+</sup> T cells.** Representative flow cytometry plots and statistical analysis of CD69 expression on T cells within the TME across various treatment groups ( $n = 4$  mice). Data are presented as the mean  $\pm$  S.D. The  $p$  values were determined by one-way ANOVA with Tukey's post-test. Source data underlying b are provided as a Source Data file.

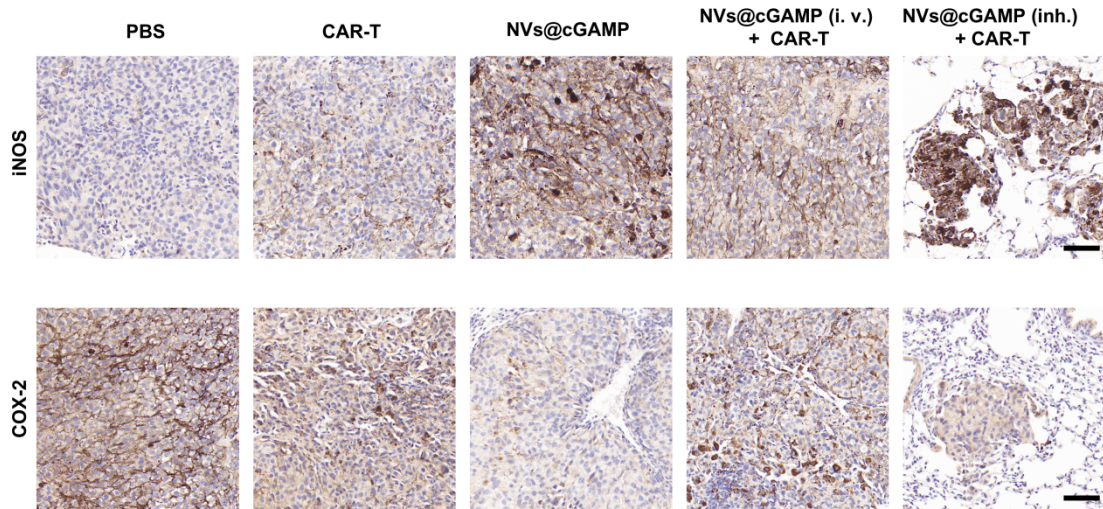

147

148 **Supplementary Figure 24. Expression of iNOS and COX-2.** LLC-MSLN tumor-bearing mice

149 receiving different treatments were assessed for iNOS and COX-2 expression in tumor tissues via

150 immunohistochemistry. Experiment was repeated three times independently with similar results.

151 Scale bar: 200  $\mu$ m.

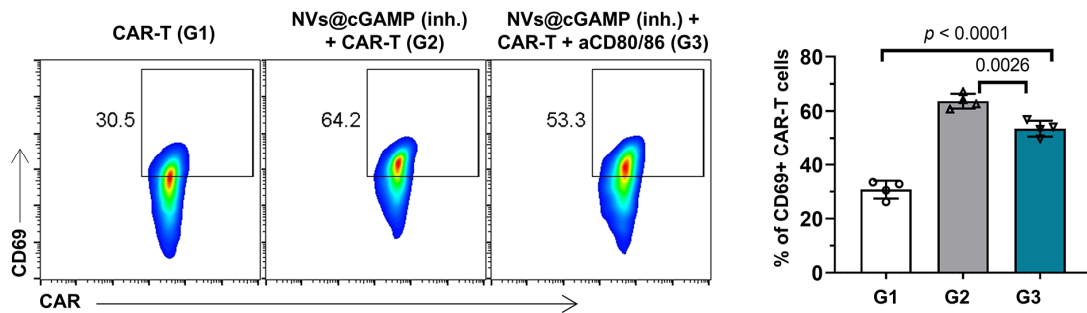

152

153 **Supplementary Figure 25. CD69 expression levels on CAR-T cells.** Representative flow

154 cytometry plots and statistical analysis of CD69 expression on CAR-T cells in peripheral blood

155 across various treatment groups ( $n = 4$  mice). Data are presented as the mean  $\pm$  S.D. The  $p$  values

156 were determined by one-way ANOVA with Tukey's post-test. Source data underlying b are provided

157 as a Source Data file.

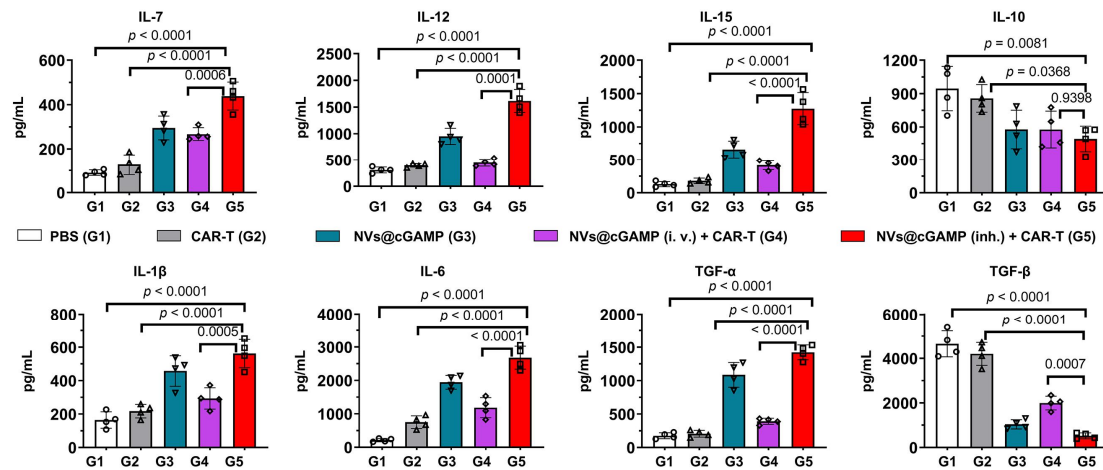

158

159 **Supplementary Figure 26. Quantification of cytokines in tumor tissues.** Cytokine concentrations  
 160 of IL-7, IL-12, IL-15, IL-10, IL-1β, IL-6, TGF-α and TGF-β in tumor tissue homogenates from  
 161 different treatment groups were quantified by ELISA ( $n = 4$  mice). Data are presented as the mean  
 162  $\pm$  S.D. The  $p$  values were determined by one-way ANOVA with Tukey's post-test. Source data are  
 163 provided as a Source Data file.

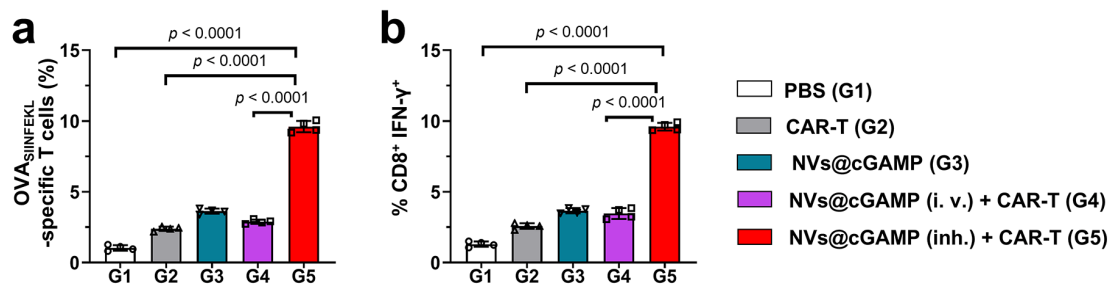

164

165 **Supplementary Figure 27. Assessment of epitope spreading.** (a) In LLC-MSLN-OVA tumor-  
 166 bearing mice, the percentage of OVA<sub>(SINFEKL)</sub>-specific CD8<sup>+</sup> T cells in the spleen was assessed *via*  
 167 flow cytometry after various treatments ( $n = 4$  mice). (b) Following stimulation with OVA peptides,  
 168 the percentage of T cells producing IFN-γ within the CD8<sup>+</sup> T cell population was analyzed across  
 169 different treatment groups ( $n = 4$  mice). Data are presented as the mean  $\pm$  S.D. The  $p$  values were  
 170 determined by one-way ANOVA with Tukey's post-test for (a) and (b). Source data underlying a-b  
 171 are provided as a Source Data file.

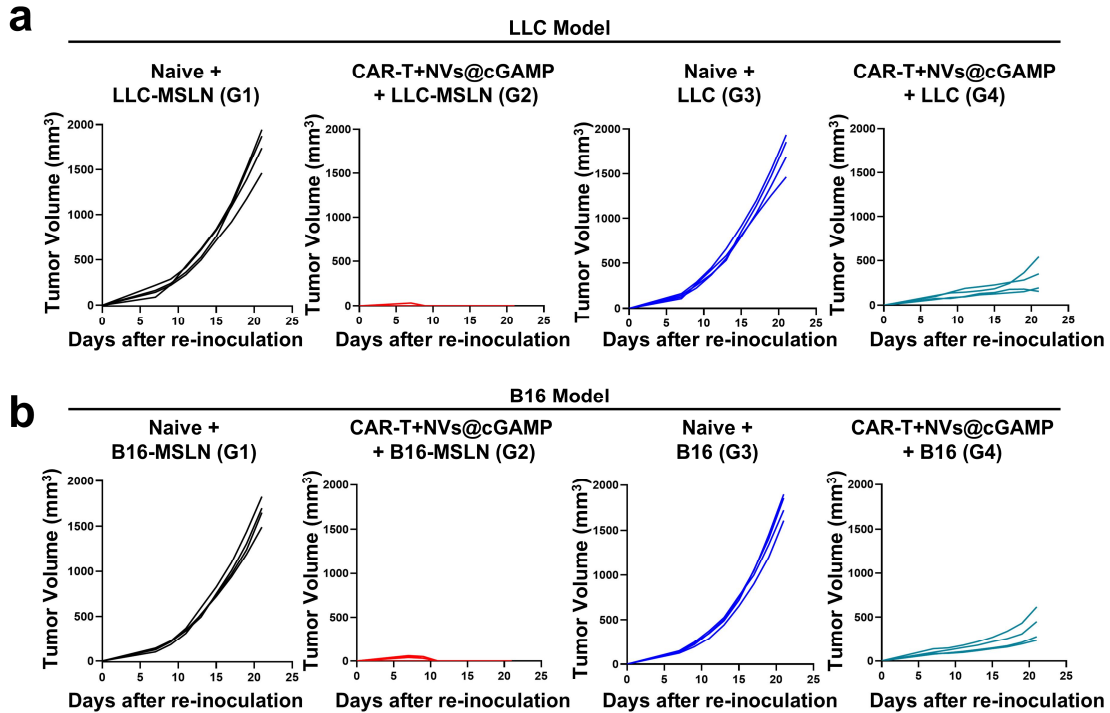

172

173

174

175

176

177

178

**Supplementary Figure 28. Changes in tumor volume in tumor-bearing mice.** (a) In the LLC tumor relapse model, tumor volume changes were assessed in naive mice and mice cured by combination therapy after subcutaneous inoculation of LLC or LLC-MSLN cells ( $n = 4$  mice). (b) In the B16 tumor relapse model, tumor volume changes were assessed in naive mice and mice cured by combination therapy after subcutaneous inoculation of B16 or B16-MSLN cells ( $n = 4$  mice). Source data underlying a–b are provided as a Source Data file.

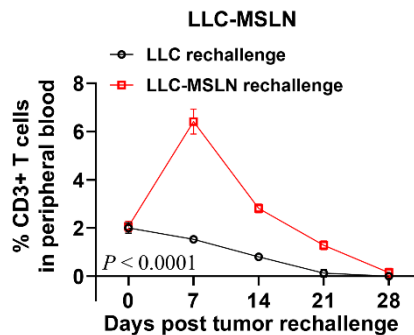

179

180

181

182

183

184

**Supplementary Figure 29. Percentage of CAR-T cells in the peripheral blood of tumor-bearing mice.** The percentage of CAR-T cells in peripheral blood at various time points after cured mice were rechallenged with either mesothelin (MSLN)-overexpressing tumor cells or parental cells ( $n = 4$  mice). Data are presented as the mean  $\pm$  S.D. The  $p$  values were determined by two-way ANOVA with Tukey's post-test. Source data are provided as a Source Data file.

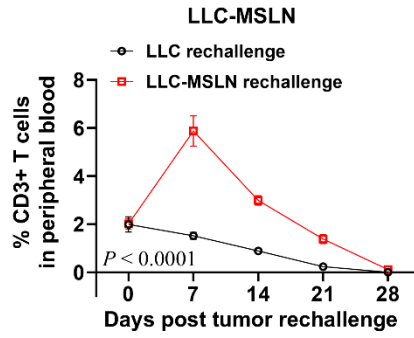

185

186 **Supplementary Figure 30. Percentage of CAR-T cells in the peripheral blood of tumor-bearing**  
 187 **mice.** Following subcutaneous injection of MSLN-overexpressing tumor cells or parental cells into  
 188 the inguinal region of cured mice, the percentages of CAR-T cells in the peripheral blood of LLC-  
 189 MSLN tumor-bearing mice were analyzed over time ( $n = 4$  mice). Data are presented as the mean  $\pm$   
 190 S.D. The  $p$  values were determined by two-way ANOVA with Tukey's post-test. Source data are  
 191 provided as a Source Data file.



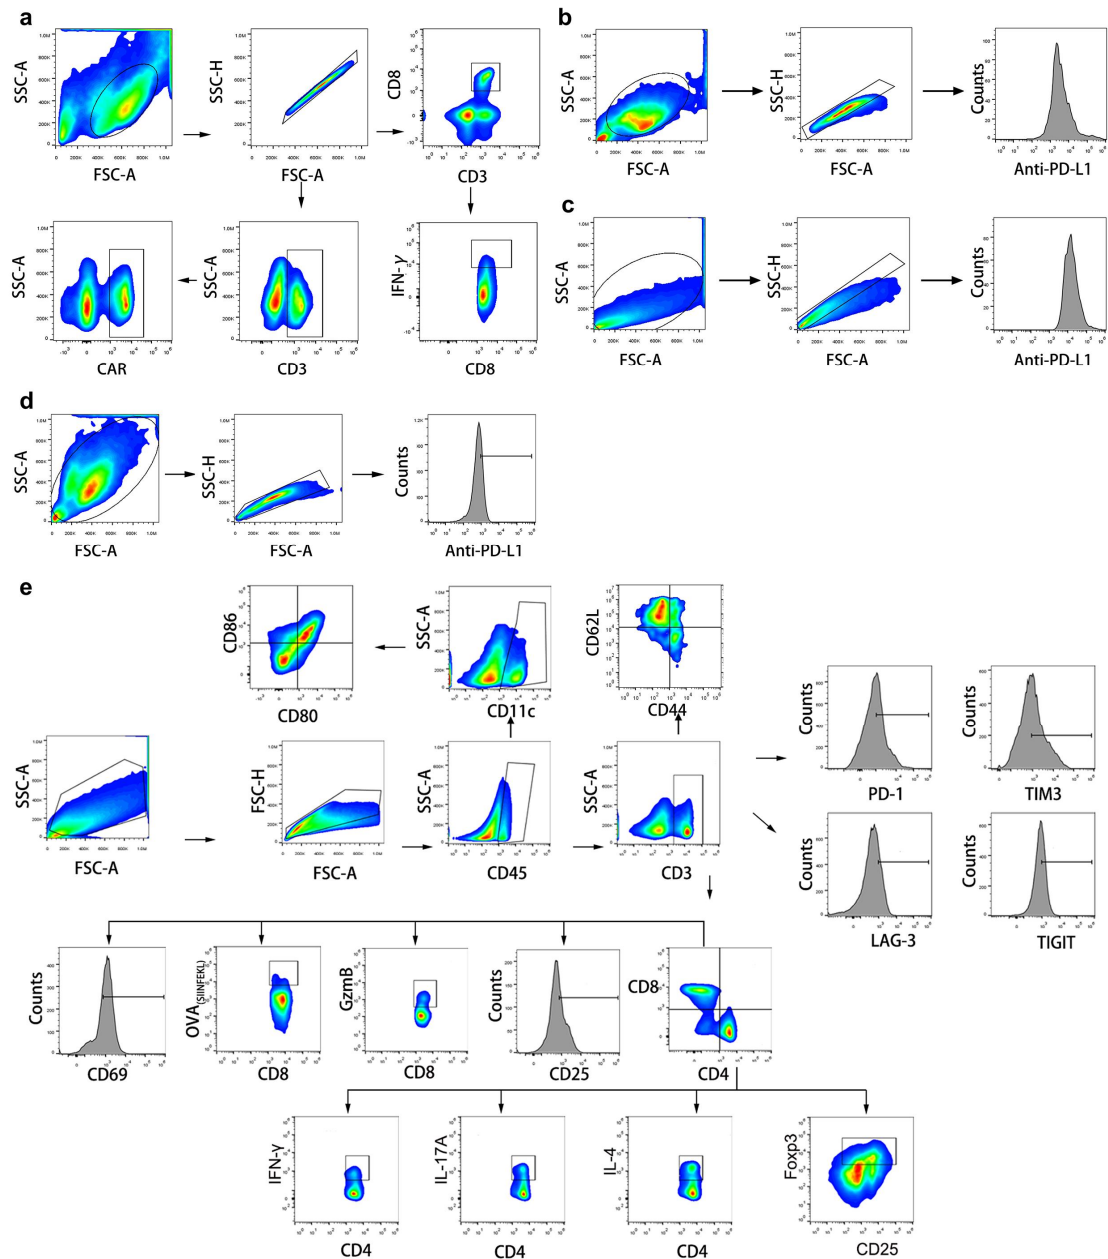

192

193 **Supplementary Figure 31. Gating strategy for flow cytometry.** a. Representative gating  
 194 strategies shown for CAR-T (Fig. 1c) and IFN- $\gamma$ -producing CD8<sup>+</sup> T cells (Fig. 8d). b-c. Expression  
 195 of the anti-PD-L1 scFv on aPD-L1 293T cells (Fig. 3b) and aPD-L1 NVs (Fig. 3f). d. PD-L1  
 196 blockade on the PC-9 cell (Fig. 3g). e. CD8<sup>+</sup> T cells and CD4<sup>+</sup> T cells (Fig. 5b, Fig. 7b), Treg cells  
 197 (Fig. 5c, Fig. 7h), MDSCs (Fig. 5e, Fig. 7h), Th cells (Fig. 5g), memory T cells (Fig. 5j), granzyme  
 198 B-expressing CD8<sup>+</sup> T cells (Fig. 7c), mature DCs (Fig. 7h) within the TME, exhaustion markers on  
 199 T cells (Fig. 5e), CD25 (Supplementary Fig. 14) and CD69 (Supplementary Fig. 23) expression on  
 200 CD8<sup>+</sup> T cells, and OVA<sub>(SIINFEKL)</sub>-specific CD8<sup>+</sup> T cells (Fig. 8c).



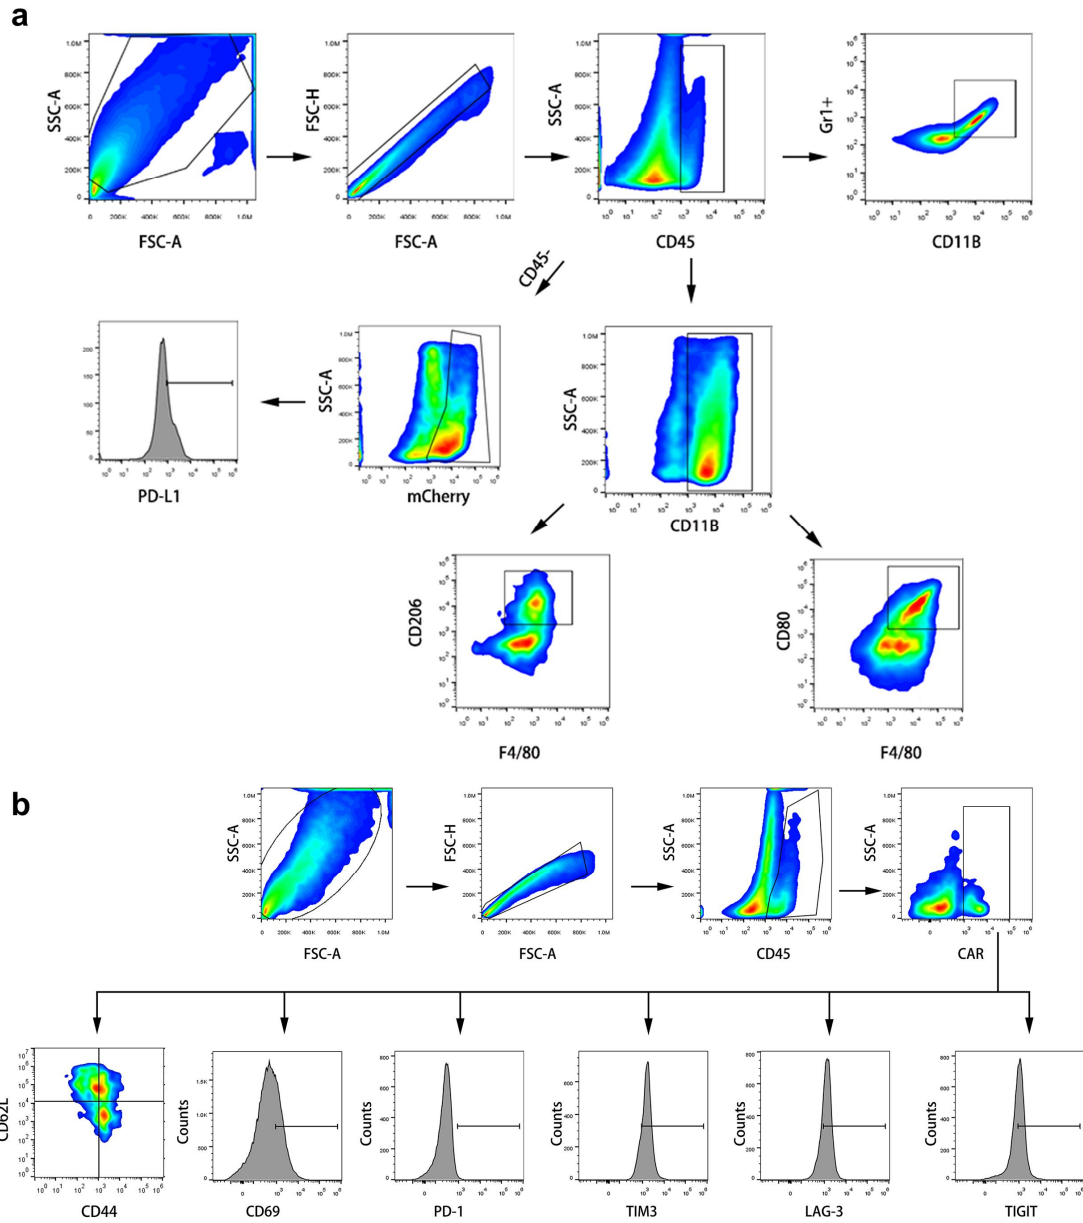

201

202 **Supplementary Figure 32. Gating strategy for flow cytometry.** a. Representative gating  
 203 strategies shown for MDSCs (Fig. 5d) macrophages (Fig. 7g) within the TME and PD-L1 expression  
 204 on tumor cells (Supplementary Fig. 13). b. Exhaustion markers on CAR-T cells (Fig. 7d), memory  
 205 T cells within the CAR-T cell population (Fig. 7i) and CD69 expression on CAR-T cells  
 206 (Supplementary Fig. 25).

207

208

**Supplementary Table 1. Primers used for current study**

| Gene name           | Forward 5'-3'             | Reverse 5'-3'             |
|---------------------|---------------------------|---------------------------|
| Anti-MSLN CAR       | TCTGGAGTGGCTGGGAGTAATATGG | TTGGCTCTTGGAGTTGTCCTTGATG |
| U6                  | CTCGCTTCGGCAGCACAT        | TTTGC GTGCATCCTTGCG       |
| Mouse IFN- $\gamma$ | CAGCAACAGCAAGGCGAAAAAGG   | TTTCCGCTTCTGAGGCTGGAT     |
| Mouse CXCL-9        | CCTAGTGATAAGGAATGCACGATG  | CTAGGCAGGTTTGATCTCCGTTCT  |
| Mouse CXCL-10       | ATCATCCCTGCGAGCCTATCCT    | GACCTTTTTTGGCTAAACGCTTTC  |

|                    |                         |                         |
|--------------------|-------------------------|-------------------------|
| Mouse IFN- $\beta$ | GCCTTTGCCATCCAAGAGATGC  | ACACTGTCTGCTGGTGGAGTTC  |
| Mouse CD274        | TGCGGACTACAAGCGAATCACG  | CTCAGCTTCTGGATAACCCTCG  |
| Mouse GAPDA        | CATCACTGCCACCCAGAAGACTG | ATGCCAGTGAGCTTCCCGTTCAG |
| Mouse IFIT1        | TACAGGCTGGAGTGTGCTGAGA  | CTCCAATTTCAGAGCCTTCGCA  |
| Mouse IFIT2        | CGAACTACCGTCTGGATGACTG  | CTTCAACCAGCGCCATTGCTTG  |
| Mouse ISG15        | CATCCTGGTGAGGAACGAAAGG  | CTCAGCCAGAACTGGTCTTCGT  |
